# Supplementary material for: Comparative Levelized Cost Analysis of Transmitting Renewable Solar Energy
Source: MDPI journal article supplement (doi:10.3390/en16041880), 2023-02-14
Supplement: s1 [file s1]

## Data in Brief

| 18% Transmission Medium Utilization | Solar Capacity (MW) | Transmission Distance (mi) | LCOE (\$/MWh) | Peak Load (MW) | Percent of Load Met (%) | Storage Capacity (MWh) |
|-------------------------------------|---------------------|----------------------------|---------------|----------------|-------------------------|------------------------|
| <b>230 kV Power Line</b>            | 915                 | 100                        | 272-348       | 337            | 95                      | 2,180                  |
| <b>230 kV Power Line</b>            | 915                 | 300                        | 312-386       | 278            | 95                      | 1,710                  |
| <b>230 kV Power Line</b>            | 915                 | 500                        | 374-447       | 218            | 95                      | 1,320                  |
| <b>500 kV Power Line</b>            | 2,115               | 100                        | 295-380       | 766            | 95                      | 5,320                  |
| <b>500 kV Power Line</b>            | 2,115               | 300                        | 314-397       | 706            | 95                      | 4,830                  |
| <b>500 kV Power Line</b>            | 2,115               | 500                        | 337-418       | 646            | 95                      | 4,340                  |
| <b>500 kV Power Line</b>            | 2,115               | 700                        | 365-445       | 587            | 95                      | 3,870                  |
| <b>24" Pipeline + FC</b>            | 430                 | 100                        | 355-438       | 112            | 100                     | 110,048                |
| <b>24" Pipeline + FC</b>            | 430                 | 300                        | 398-482       | 111            | 100                     | 107,858                |
| <b>24" Pipeline + FC</b>            | 510                 | 500                        | 452-538       | 128            | 100                     | 126,290                |
| <b>36" Pipeline + FC</b>            | 1,190               | 100                        | 321-403       | 318            | 100                     | 316,920                |
| <b>36" Pipeline + FC</b>            | 1,190               | 300                        | 350-432       | 316            | 100                     | 308,555                |
| <b>36" Pipeline + FC</b>            | 1,410               | 500                        | 396-480       | 366            | 100                     | 356,301                |
| <b>36" Pipeline + FC</b>            | 1,250               | 700                        | 424-508       | 322            | 100                     | 313,393                |
| <b>24" Pipeline + GT</b>            | 430                 | 100                        | 309-311       | 112            | 100                     | 110,048                |
| <b>24" Pipeline + GT</b>            | 430                 | 300                        | 352-355       | 111            | 100                     | 107,858                |
| <b>24" Pipeline + GT</b>            | 510                 | 500                        | 405-411       | 128            | 100                     | 126,290                |
| <b>36" Pipeline + GT</b>            | 1,190               | 100                        | 276-277       | 318            | 100                     | 316,920                |
| <b>36" Pipeline + GT</b>            | 1,190               | 300                        | 305-306       | 316            | 100                     | 308,555                |
| <b>36" Pipeline + GT</b>            | 1,410               | 500                        | 351-353       | 366            | 100                     | 356,301                |
| <b>36" Pipeline + GT</b>            | 1,250               | 700                        | 378-381       | 322            | 100                     | 313,393                |

| 1200 Peak Demand Scenario | Solar Capacity (MW) | Transmission Distance (mi) | LCOE (\$/MWh) | Peak Load (MW) | Percent of Load Met (%) | Storage Capacity (MWh) |
|---------------------------|---------------------|----------------------------|---------------|----------------|-------------------------|------------------------|
| <b>230 kV Power Line</b>  | 3,280               | 100                        | 277-356       | 1,210          | 95                      | 7,886                  |
| <b>230 kV Power Line</b>  | 4,020               | 300                        | 312-391       | 1,210          | 95                      | 7,907                  |
| <b>230 kV Power Line</b>  | 4,700               | 500                        | 348-420       | 1,210          | 95                      | 7,191                  |
| <b>500 kV Power Line</b>  | 3,340               | 100                        | 303-390       | 1,210          | 95                      | 8,686                  |
| <b>500 kV Power Line</b>  | 3,550               | 300                        | 320-404       | 1,210          | 95                      | 8,392                  |
| <b>500 kV Power Line</b>  | 3,880               | 500                        | 342-425       | 1,210          | 95                      | 8,255                  |
| <b>500 kV Power Line</b>  | 4,390               | 700                        | 372-455       | 1,210          | 95                      | 8,303                  |
| <b>230 kV Power Line</b>  | 3,220               | 100                        | 15,874-21,818 | 1,210          | 100                     | 605,451                |
| <b>230 kV Power Line</b>  | 3,580               | 300                        | 15,765-21,655 | 1,210          | 100                     | 599,704                |

|                          |       |     |               |       |     |           |
|--------------------------|-------|-----|---------------|-------|-----|-----------|
| <b>230 kV Power Line</b> | 4,180 | 500 | 15,866-21,777 | 1,210 | 100 | 601,945   |
| <b>500 kV Power Line</b> | 3,290 | 100 | 15,835-21,761 | 1,210 | 100 | 603,646   |
| <b>500 kV Power Line</b> | 3,520 | 300 | 15,894-21,834 | 1,210 | 100 | 605,063   |
| <b>500 kV Power Line</b> | 3,830 | 500 | 15,870-21,792 | 1,210 | 100 | 603,146   |
| <b>500 kV Power Line</b> | 4,330 | 700 | 15,885-21,802 | 1,210 | 100 | 602,634   |
| <b>24" Pipeline + FC</b> | 4,650 | 100 | 322-405       | 1,210 | 100 | 1,202,648 |
| <b>24" Pipeline + FC</b> | 4,710 | 300 | 378-462       | 1,210 | 100 | 1,174,926 |
| <b>24" Pipeline + FC</b> | 4,900 | 500 | 484-570       | 1,210 | 100 | 1,192,350 |
| <b>36" Pipeline + FC</b> | 4,480 | 100 | 308-389       | 1,210 | 100 | 1,170,688 |
| <b>36" Pipeline + FC</b> | 4,540 | 300 | 342-424       | 1,210 | 100 | 1,176,519 |
| <b>36" Pipeline + FC</b> | 4,680 | 500 | 404-487       | 1,210 | 100 | 1,166,393 |
| <b>36" Pipeline + FC</b> | 4,740 | 700 | 441-526       | 1,210 | 100 | 1,175,143 |
| <b>24" Pipeline + GT</b> | 4,650 | 100 | 277-278       | 1,210 | 100 | 1,202,648 |
| <b>24" Pipeline + GT</b> | 4,710 | 300 | 332-335       | 1,210 | 100 | 1,174,926 |
| <b>24" Pipeline + GT</b> | 4,900 | 500 | 435-443       | 1,210 | 100 | 1,192,350 |
| <b>36" Pipeline + GT</b> | 4,480 | 100 | 264-262       | 1,210 | 100 | 1,170,688 |
| <b>36" Pipeline + GT</b> | 4,540 | 300 | 298-297       | 1,210 | 100 | 1,176,519 |
| <b>36" Pipeline + GT</b> | 4,680 | 500 | 358-360       | 1,210 | 100 | 1,166,393 |
| <b>36" Pipeline + GT</b> | 4,740 | 700 | 395-399       | 1,210 | 100 | 1,175,143 |
